# Supplementary material for: Transcriptomics Integrated with Metabolomics: Assessing the Central Metabolism of Different Cells after Cell Differentiation in Aureobasidium pullulans NG
Source: MDPI journal article supplement (doi:10.3390/jof8080882), 2022-08-22
Supplement: s1 [file s1]

**Table S1** primers for this study.

| Primer name      | Primer sequence(5'-3')    |
|------------------|---------------------------|
| SC16908_c1_g2-F  | GTCCGTGATATTCGTGGCTGGTC   |
| SC16908_c1_g2-R  | TGTGAGAACGGTTGACGCTTGG    |
| SC16627_c2_g5-F  | TGCTCCTCGTCGTACACCTATCTAC |
| SC16627_c2_g5-R  | TACTGCGTTGACCTTCCAAGTTGTG |
| SC2555_c0_g1-F   | GCTGTATGCGGACAAGGATCTGG   |
| SC2555_c0_g1-R   | GGTGAGTCAACGGTTAGCCATATCG |
| SC16598_c2_g1-F  | TCGCCTGAACGCATTGAGAACG    |
| SC16598_c2_g1-R  | GACTCCGATGACAGCAACGAGATAC |
| SC16876_c1_g2-F  | TCATTGGAAAGGTCGTCAAGGTTGG |
| SC16876_c1_g2-R  | AGTAGTTCTCTTGGTCGGCATTGC  |
| SC16337_c0_g3-F  | CGACAAGGTCATCAACGACAAGTTC |
| SC16337_c0_g3-R  | TCTTATGGGTGGCGGTGTAGGAG   |
| SC16350_c0_g1-F  | TGACCACCATCCACTCCTACACC   |
| SC16350_c0_g1-R  | AATGACCTTGCCGACAGCCTTG    |
| SC14418_c0_g3-F  | CGAATGCGGGTCTCTGTTCATG    |
| SC14418_c0_g3-R  | GACGAAACACGCTGGTCTGGAG    |
| SC16410_c0_g3-F  | CGCTCTCTCCTCTCCTTTCCTCTC  |
| SC16410_c0_g3-R  | GCCAACCTCAGCCTTCATCTCAG   |
| SC16898_c5_g17-F | CTTGAGCGTGACGAGACTCTTAGC  |
| SC16898_c5_g17-R | TTGCGGTTGTAGGAAGTGAAGATGG |

**Table S2** Candidate genes involved in antioxidation in SC.

| Description                              | Gene ID     | KEGG pathway                 | Expressd level |
|------------------------------------------|-------------|------------------------------|----------------|
| CAT1 catalase                            | SC16638_0_1 | Glyoxylate and dicarboxylate | UP             |
|                                          | SC16638_0_2 | metabolism                   | UP             |
|                                          | SC16638_0_3 |                              | UP             |
| S-2-hydroxy-acid<br>oxidase-like protein | SC4646_0_1  | Glyoxylate and dicarboxylate | UP             |
|                                          |             | metabolism                   |                |
| catalase-domain-containing<br>protein    | SC16908_1_2 | Glyoxylate and dicarboxylate | UP             |
|                                          | SC16908_1_1 | metabolism                   | UP             |
| isocitrate lyase and<br>phosphorylmutase | SC16145_0_1 | Glyoxylate and dicarboxylate | UP             |
|                                          | SC16312_3_7 | metabolism                   | UP             |
| CAT2 catalase                            | SC16627_2_5 | Glyoxylate and dicarboxylate | UP             |
|                                          | SC16627_2_3 | metabolism                   | UP             |
|                                          |             |                              |                |
| malate dehydrogenase                     | SC16905_3_2 | Pyruvate metabolism          | UP             |
|                                          | SC16905_3_1 |                              | UP             |
|                                          | SC15936_0_2 | Glycolysis / Gluconeogenesis | UP             |
| malate synthase                          | SC13547_0_1 | Glyoxylate and dicarboxylate | UP             |
|                                          |             | metabolism                   |                |
| ATP-utilizing                            | SC16713_6_1 | Glycolysis / Gluconeogenesis | UP             |
| phosphoenolpyruvate                      | SC16713_4_4 |                              | UP             |
| carboxykinase                            | SC16713_4_1 |                              | UP             |

|                                          |             |                                 |    |
|------------------------------------------|-------------|---------------------------------|----|
|                                          | SC16713_4_6 | Pyruvate metabolism             | UP |
| L-lactate dehydrogenase                  | SC2555_0_1  | Pyruvate metabolism             | UP |
| acyl-CoA oxidase                         | SC16549_2_1 | Fatty acid degradation          | UP |
|                                          | SC16598_2_1 |                                 | UP |
|                                          | SC16641_0_4 |                                 | UP |
|                                          | SC15352_1_1 |                                 | UP |
| alcohol dehydrogenase                    | SC16055_0_2 | Glycolysis / Gluconeogenesis    | UP |
|                                          | SC16055_0_1 |                                 | UP |
|                                          | SC16341_0_6 |                                 | UP |
|                                          | SC16876_1_2 |                                 | UP |
| fructose-BISphosphate                    | SC15595_0_2 | Pentose phosphate pathway       | UP |
| ALDOLASE, class II                       | SC15595_0_1 | Pentose phosphate pathway       | UP |
|                                          | SC15595_0_2 | Fructose and mannose metabolism | UP |
| fructose-1,6-bisphosphatase              | SC16924_2_1 | Fructose and mannose metabolism | UP |
| glyceraldehyde-3-phosphate dehydrogenase | SC16337_0_3 | Glycolysis / Gluconeogenesis    | UP |
|                                          | SC16350_0_1 |                                 | UP |
| alpha-amylase                            | SC14418_0_3 | Starch and sucrose metabolism   | UP |
|                                          | SC14418_0_1 |                                 |    |

Table S3 Differential metabolite KEGG enrichment results in SC.

| KEGG pathway                               | Total | Hits | Raw p   | -LOG(p) |
|--------------------------------------------|-------|------|---------|---------|
| Nitrogen metabolism                        | 8     | 3    | 0.20697 | 1.5752  |
| beta-Alanine metabolism                    | 7     | 2    | 0.42941 | 0.84535 |
| Valine, leucine and isoleucine degradation | 16    | 4    | 0.41035 | 0.89074 |
| Arginine and proline metabolism            | 37    | 8    | 0.48088 | 0.73214 |
| Tyrosine metabolism                        | 19    | 4    | 0.55568 | 0.58755 |
| Lysine biosynthesis                        | 19    | 4    | 0.55568 | 0.58755 |
| Propanoate metabolism                      | 14    | 3    | 0.56118 | 0.57771 |
| Nicotinate and nicotinamide metabolism     | 9     | 2    | 0.5712  | 0.56001 |
| Pyrimidine metabolism                      | 35    | 7    | 0.58235 | 0.54068 |
| Alanine, aspartate and glutamate           | 20    | 4    | 0.59983 | 0.51112 |

|                                                     |    |    |         |          |
|-----------------------------------------------------|----|----|---------|----------|
| metabolism                                          |    |    |         |          |
| Pantothenate and CoA biosynthesis                   | 16 | 3  | 0.65809 | 0.41841  |
| Tryptophan metabolism                               | 27 | 5  | 0.6654  | 0.40736  |
| Phenylalanine, tyrosine and tryptophan biosynthesis | 22 | 4  | 0.67981 | 0.38593  |
| Vitamin B6 metabolism                               | 11 | 2  | 0.68579 | 0.37718  |
| Purine metabolism                                   | 60 | 11 | 0.69879 | 0.3584   |
| Pentose and glucuronate interconversions            | 12 | 2  | 0.73304 | 0.31055  |
| Valine, leucine and isoleucine biosynthesis         | 24 | 4  | 0.74804 | 0.2903   |
| Citrate cycle (TCA cycle)                           | 20 | 3  | 0.80358 | 0.21868  |
| Glycine, serine and threonine metabolism            | 26 | 4  | 0.80466 | 0.21733  |
| Glyoxylate and dicarboxylate metabolism             | 14 | 2  | 0.80964 | 0.21117  |
| Lysine degradation                                  | 16 | 2  | 0.8661  | 0.14376  |
| Glutathione metabolism                              | 23 | 3  | 0.8753  | 0.13318  |
| Cyanoamino acid metabolism                          | 10 | 1  | 0.89681 | 0.10891  |
| Pentose phosphate pathway                           | 18 | 2  | 0.90687 | 0.097757 |
| Thiamine metabolism                                 | 11 | 1  | 0.91791 | 0.085654 |
| Riboflavin metabolism                               | 11 | 1  | 0.91791 | 0.085654 |
| Inositol phosphate metabolism                       | 19 | 2  | 0.92262 | 0.080542 |
| Cysteine and methionine metabolism                  | 33 | 4  | 0.9273  | 0.075482 |
| Sulfur metabolism                                   | 13 | 1  | 0.9481  | 0.053296 |
| Aminoacyl-tRNA                                      | 67 | 9  | 0.95052 | 0.050746 |

|                                             |    |   |         |            |
|---------------------------------------------|----|---|---------|------------|
| biosynthesis                                |    |   |         |            |
| Amino sugar and nucleotide sugar metabolism | 24 | 2 | 0.97026 | 0.030188   |
| Fructose and mannose metabolism             | 17 | 1 | 0.97933 | 0.020888   |
| Butanoate metabolism                        | 17 | 1 | 0.97933 | 0.020888   |
| Steroid biosynthesis                        | 23 | 1 | 0.99485 | 0.005161   |
| Glycolysis or Gluconeogenesis               | 24 | 1 | 0.99592 | 0.0040869  |
| Glycerophospholipid metabolism              | 26 | 1 | 0.99744 | 0.0025613  |
| Fatty acid metabolism                       | 28 | 1 | 0.9984  | 0.0016035  |
| Biosynthesis of unsaturated fatty acids     | 42 | 2 | 0.99928 | 0.00072046 |
| Fatty acid biosynthesis                     | 37 | 1 | 0.99981 | 0.00019215 |

Note: Total, total number of metabolites in the target metabolic pathway; Hits, number of differential metabolites in the target metabolic pathway, Raw p, p-value of the hypergeometric distribution test; -log(p): negative value for the natural logarithm of the p-value.
